# Supplementary material for: Temperature and ion dual responsive biphenyl-dipeptide supramolecular hydrogels as extracellular matrix mimic-scaffolds for cell culture applications
Source: Royal Society of Chemistry journal article supplement (doi:10.1039/c7tb00576h), 2017-01-01
Supplement: c7tb00576h1.pdf [file c7tb00576h1.pdf]

## Electronic Supporting Information

### A temperature and ion dual responsive biphenyl-dipeptide supramolecular hydrogels as extracellular matrix mimic-scaffolds for cell culture application

Shaoquan Bian, Hanxu Cai, Yani Cui, Wanxu Cao, Yingying Teng, Yong Sun\*, Jie Liang, Yujiang Fan\*, and Xingdong Zhang.

National Engineering Research Center for Biomaterials, Sichuan University, 29 Wangjiang Road, Chengdu 610064, China.

#### Supplementary Tables

**Table S1.** Gelation properties of BPAA-FF-OH through ion induction.

| Entry | Compound   | Salt                            | Concentration | Appearance [a]       | MGC             |
|-------|------------|---------------------------------|---------------|----------------------|-----------------|
| 1     | BPAA-FF-OH | LiCl                            | 0.15 M        | Transparent hydrogel | 10 mM/ 0.50 wt% |
| 2     | BPAA-FF-OH | NaCl                            | 0.15 M        | Transparent hydrogel | 10 mM/ 0.50 wt% |
| 3     | BPAA-FF-OH | KCl                             | 0.15 M        | Transparent hydrogel | 10 mM/ 0.50 wt% |
| 4     | BPAA-FF-OH | RbCl                            | 0.15 M        | Transparent hydrogel | 10 mM/ 0.50 wt% |
| 5     | BPAA-FF-OH | NaAc                            | 0.15 M        | Transparent hydrogel | 10 mM/ 0.50 wt% |
| 6     | BPAA-FF-OH | NaNO <sub>3</sub>               | 0.15 M        | Transparent hydrogel | 10 mM/ 0.50 wt% |
| 7     | BPAA-FF-OH | Na <sub>2</sub> SO <sub>4</sub> | 0.15 M        | Transparent hydrogel | 10 mM/ 0.50 wt% |
| 8     | BPAA-FF-OH | Na <sub>3</sub> PO <sub>4</sub> | 0.15 M        | Transparent hydrogel | 10 mM/ 0.50 wt% |
| 9     | BPAA-FF-OH | MgCl <sub>2</sub>               | 0.05 M        | Precipitation        | n/a             |
| 10    | BPAA-FF-OH | CaCl <sub>2</sub>               | 0.05 M        | Precipitation        | n/a             |

[a]: The gelling time is about 30 minutes.

MGC = minimum gelation concentration. n/a = not applicable.

#### Supplementary Figures

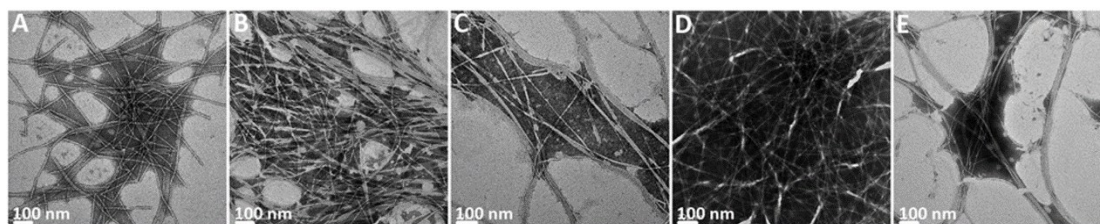

**Figure S1.** TEM images of nanostructures in BPAA-FF-OH hydrogels induced by (A) NaCl, (B) NaNO<sub>3</sub>, (C) CH<sub>3</sub>COONa, (D) Na<sub>2</sub>SO<sub>4</sub>, (E) Na<sub>3</sub>PO<sub>4</sub>. (Gel = 0.50 wt%, salt = 0.15 M)

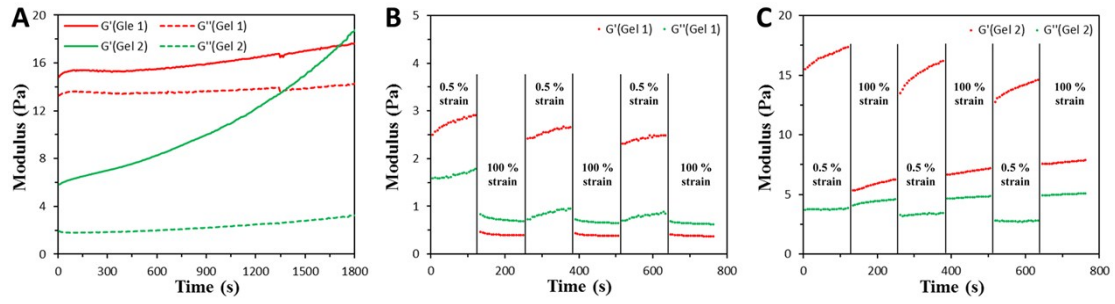

**Figure S2.** (A) Time sweep analysis of hydrogels at room temperature (Strain = 0.5 %, Frequency = 1.0 Hz). Thixotropy of Gel 1 (B) and Gel 2 (C) with different amplitude (Frequency = 1.0 Hz, Strain = 0.5 % and 100 %). (Gel 1 = 0.5 wt%, Gel 2 = 1.0 wt%).

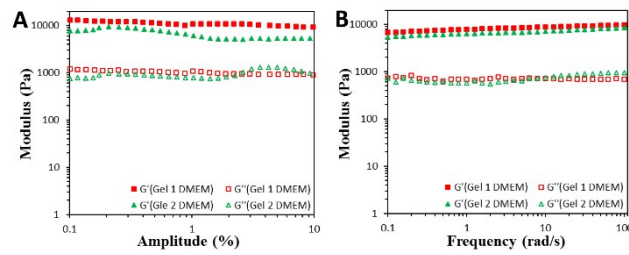

**Figure S3.** (A) Amplitude sweep analysis of hydrogels swelling in DMEM for 24 hours (Frequency = 1.0 Hz). (B) Frequency sweep analysis of hydrogels swelling in DMEM for 24 hours (Strain = 0.5 %). (Gel 1 = 0.5 wt%, Gel 2 = 1.0 wt%).
